# Supplementary material for: Bright and blind spots of water research in Latin America and the Caribbean
Source: Copernicus journal article supplement (doi:10.5194/hess-25-4631-2021), 2021-08-30
Supplement: Supplementary file 2 [file hess-25-4631-2021-supplement.zip]

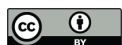

*Supplement of*

**Bright and blind spots of water research in Latin America and the Caribbean**

Alyssa J. DeVincentis et al.

*Correspondence to:* [ajdevincentis@ucdavis.edu](mailto:ajdevincentis@ucdavis.edu)

- [hess-25-4631-2021-supplement-title-page.pdf](#)
- [Data S1 - Socio-hydrologic attributes - Sheet1.csv](#)
- [supplementary-materials.pdf](#)

The copyright of individual parts of the supplement might differ from the article licence.
